# Supplementary material for: Detection of focal source and arrhythmogenic substrate from body surface potentials to guide atrial fibrillation ablation
Source: PubMed Central journal article supplement (PMC8970486; doi:10.1371/journal.pcbi.1009893), 2022-03-21
Supplement: pcbi.1009893.s014.pdf [file pcbi.1009893.s014.pdf]

| Focal CL<br>(ms) | FS<br>location | AF inducibility<br>(+ACh, -ACh) | p-value<br>(+ACh > -ACh) |
|------------------|----------------|---------------------------------|--------------------------|
| 120              | PV             | 0.05, 0                         |                          |
|                  | LA             | 0.03, 0.01                      |                          |
|                  | RA             | 0, 0                            |                          |
| 150              | PV             | 0.70, 0.30                      | <b>&lt;0.01</b>          |
|                  | LA             | 0.40, 0                         | <b>&lt;0.0001</b>        |
|                  | RA             | 0, 0                            |                          |
| 180              | PV             | 0.95, 0.95                      |                          |
|                  | LA             | 0.95, 0.81                      | <b>&lt;0.01</b>          |
|                  | RA             | 0.01, 0.01                      |                          |
| 210              | PV             | 0.35, 0.25                      |                          |
|                  | LA             | 0.36, 0.17                      | <b>&lt;0.01</b>          |
|                  | RA             | 0.21, 0.26                      |                          |
| 240              | PV             | 0, 0                            |                          |
|                  | LA             | 0, 0                            |                          |
|                  | RA             | 0.05, 0.05                      |                          |
| 270              | PV             | 0, 0                            |                          |
|                  | LA             | 0, 0                            |                          |
|                  | RA             | 0, 0                            |                          |
