# Supplementary material for: Detection of focal source and arrhythmogenic substrate from body surface potentials to guide atrial fibrillation ablation
Source: PubMed Central journal article supplement (PMC8970486; doi:10.1371/journal.pcbi.1009893), 2022-03-21
Supplement: pcbi.1009893.s015.pdf [file pcbi.1009893.s015.pdf]

| CL  | AF inducibility | <b>SO-BSS</b><br>(BSPM) | <i>AFFT</i> <sub>2DF</sub><br>(V1 ECG) | NDI<br>(BSPM) |
|-----|-----------------|-------------------------|----------------------------------------|---------------|
| 120 | 1.9±0.8         | <b>98.8±1.2</b>         | 60.9±11.1                              | 67.3±8.9      |
| 150 | 14.3±2.1        | <b>88.6±3.2</b>         | 71.7±3.6                               | 62.9±8.6      |
| 180 | 49.1±2.2        | <b>97.2±3.0</b>         | 63.5±3.9                               | 69.4±5.2      |
| 210 | 25.7±18.5       | <b>65.9±12.5</b>        | 49.2±3.3                               | 53.4±16.6     |
| 240 | 3.8±0.9         | <b>98.9±1.9</b>         | 61.7±5.4                               | 65.6±7.8      |
| 270 | 0               | <b>99.4±1.3</b>         | 54.8±4.9                               | 60.5±3.8      |
