# Supplementary material for: Detection of focal source and arrhythmogenic substrate from body surface potentials to guide atrial fibrillation ablation
Source: PubMed Central journal article supplement (PMC8970486; doi:10.1371/journal.pcbi.1009893), 2022-03-21
Supplement: pcbi.1009893.s016.pdf [file pcbi.1009893.s016.pdf]

|                                    |               | Original | Rotate around z axis (degree) |       |       |       | Translate in x direction (cm) |       |       |       | Translate in y direction (cm) |       |       |       | Translate in z direction (cm) |       |       |       |
|------------------------------------|---------------|----------|-------------------------------|-------|-------|-------|-------------------------------|-------|-------|-------|-------------------------------|-------|-------|-------|-------------------------------|-------|-------|-------|
|                                    |               |          | -20                           | -10   | 10    | 20    | -10                           | -5    | 5     | 10    | -10                           | -5    | 5     | 10    | -10                           | -5    | 5     | 10    |
| Absolute dominant<br>CL difference | Mean (ms)     | 0.0      | 3.05                          | 2.41  | 3.39  | 4.35  | 2.99                          | 2.53  | 3.76  | 3.14  | 4.65                          | 2.27  | 4.78  | 7.09  | 2.92                          | 2.06  | 1.21  | 2.91  |
|                                    | s.d. (ms)     | 0.0      | 20.15                         | 17.35 | 20.57 | 24.18 | 17.49                         | 17.26 | 22.21 | 20.15 | 22.78                         | 15.44 | 23.83 | 30.02 | 18.94                         | 16.14 | 11.49 | 18.48 |
| FS presence                        | Accuracy (%)  | 91.3     | 90.8                          | 91.6  | 90.8  | 90.7  | 90.2                          | 91.6  | 91.5  | 90.8  | 90.5                          | 90.7  | 90.7  | 91.9  | 91.8                          | 91.0  | 91.6  | 90.8  |
|                                    | Precision (%) | 97.7     | 97.6                          | 97.9  | 97.4  | 97.1  | 97.1                          | 97.7  | 97.7  | 98.7  | 93.1                          | 96.4  | 96.6  | 94.5  | 97.7                          | 97.4  | 97.7  | 96.7  |
|                                    | Recall (%)    | 89.3     | 88.6                          | 89.5  | 88.8  | 88.8  | 88.1                          | 89.8  | 89.5  | 87.6  | 92.9                          | 89.5  | 89.3  | 93.6  | 90.0                          | 89.0  | 89.8  | 89.5  |
| AF sustainability                  | Accuracy (%)  | 93.7     | 92.8                          | 93.4  | 92.6  | 92.9  | 92.9                          | 92.9  | 93.4  | 93.2  | 93.4                          | 92.4  | 93.1  | 92.1  | 92.8                          | 92.9  | 93.6  | 92.8  |
|                                    | Precision (%) | 94.0     | 92.6                          | 93.6  | 91.6  | 92.3  | 92.9                          | 92.6  | 92.7  | 92.6  | 95.0                          | 92.8  | 93.6  | 93.4  | 91.6                          | 92.6  | 92.7  | 92.9  |
|                                    | Recall (%)    | 91.6     | 90.9                          | 91.2  | 91.6  | 91.6  | 90.9                          | 91.2  | 92.3  | 92.0  | 89.8                          | 89.8  | 90.5  | 88.3  | 92.0                          | 91.2  | 92.7  | 90.5  |
| AF sustainability<br>(from FS)     | Accuracy (%)  | 90.7     | 89.5                          | 90.5  | 89.0  | 89.8  | 89.8                          | 89.8  | 90.2  | 90.2  | 90.5                          | 89.5  | 89.8  | 88.8  | 89.3                          | 89.5  | 90.7  | 89.5  |
|                                    | Precision (%) | 75.8     | 71.0                          | 74.6  | 68.5  | 70.8  | 72.1                          | 71.4  | 72.2  | 72.2  | 78.0                          | 71.6  | 73.4  | 71.7  | 68.9                          | 71.0  | 73.0  | 71.6  |
|                                    | Recall (%)    | 68.5     | 67.1                          | 68.5  | 68.5  | 69.9  | 67.1                          | 68.5  | 71.2  | 71.2  | 63.0                          | 65.8  | 64.4  | 58.9  | 69.9                          | 67.1  | 74.0  | 65.8  |
| Focal site region<br>(from FS)     | Accuracy (%)  | 83.6     | 78.1                          | 79.8  | 79.5  | 73.6  | 59.8                          | 75.5  | 65.5  | 53.6  | 75.7                          | 76.9  | 67.6  | 54.0  | 57.6                          | 71.0  | 66.2  | 63.1  |
|                                    | Precision (%) | 87.7     | 82.1                          | 84.1  | 81.9  | 77.9  | 62.9                          | 81.1  | 73.3  | 45.2  | 81.7                          | 81.0  | 73.3  | 48.5  | 56.1                          | 71.1  | 82.9  | 89.4  |
|                                    | Recall (%)    | 74.5     | 66.7                          | 68.8  | 70.8  | 58.9  | 29.2                          | 60.4  | 38.5  | 7.3   | 60.4                          | 64.6  | 45.8  | 8.3   | 33.3                          | 61.5  | 32.8  | 21.9  |
