# Supplementary material for: Detection of focal source and arrhythmogenic substrate from body surface potentials to guide atrial fibrillation ablation
Source: PubMed Central journal article supplement (PMC8970486; doi:10.1371/journal.pcbi.1009893), 2022-03-21
Supplement: pcbi.1009893.s017.pdf [file pcbi.1009893.s017.pdf]

|        | No. nodes | Triangular elements |                                |      |     |      | Linear elements |                                |      |     |       |
|--------|-----------|---------------------|--------------------------------|------|-----|------|-----------------|--------------------------------|------|-----|-------|
|        |           | No. elements        | Edge lengths ( $\mu\text{m}$ ) |      |     |      | No. elements    | Edge lengths ( $\mu\text{m}$ ) |      |     |       |
|        |           |                     | Mean                           | s.d. | Min | Max  |                 | Mean                           | s.d. | Min | Max   |
| Mesh 1 | 492799    | 97421               | 352                            | 74   | 58  | 1701 | 1191111         | 111                            | 79   | 94  | 11465 |
| Mesh 2 | 595997    | 1178840             | 351                            | 73   | 57  | 1595 | 1445899         | 110                            | 99   | 100 | 11016 |
| Mesh 3 | 402343    | 793683              | 348                            | 60   | 49  | 1069 | 963281          | 110                            | 74   | 100 | 8584  |
| Mesh 4 | 528589    | 1045271             | 349                            | 66   | 58  | 1701 | 1270575         | 108                            | 72   | 94  | 11465 |
| Mesh 5 | 427664    | 844727              | 352                            | 58   | 9   | 911  | 1040902         | 109                            | 88   | 64  | 11286 |
