# Supplementary material for: Detection of focal source and arrhythmogenic substrate from body surface potentials to guide atrial fibrillation ablation
Source: PubMed Central journal article supplement (PMC8970486; doi:10.1371/journal.pcbi.1009893), 2022-03-21
Supplement: pcbi.1009893.s018.pdf [file pcbi.1009893.s018.pdf]

|                                                |           |
|------------------------------------------------|-----------|
| Gender                                         |           |
| Female                                         | 9 (17.3)  |
| Male                                           | 43 (82.7) |
| Age (years)                                    | 58.3±11.6 |
| Body mass index                                | 26.8±4.1  |
| AF total duration (years)                      | 7.1±6.2   |
| Maximum AF duration (hours)                    | 36±30     |
| CHADS <sub>2</sub> score (sample=37)           |           |
| 0                                              | 24 (64.9) |
| 1                                              | 10 (27.0) |
| 2                                              | 2 (5.4)   |
| 5                                              | 1 (2.7)   |
| Echocardiographic parameters                   |           |
| Left ventricle ejection fraction (%)           | 59±8      |
| Left atrial surface (cm <sup>2</sup> )         | 23±9      |
| Usage of ≥ 1 anti-arrhythmic drugs (sample=36) | 30 (83.3) |
| Patients with ≥ 1 DC cardioversion (sample=37) | 3 (8.1)   |
| Patients with amiodarone (sample=37)           | 6 (16.2)  |
| Procedure time (hours)                         | 3.9±1.7   |
| Other diseases                                 |           |
| Hypertension                                   | 15 (28.8) |
| Diabetes                                       | 2 (3.8)   |
| Stroke                                         | 3 (5.8)   |
